1 Threatened and Priority listed *Melaleuca* species from Western Australia display high susceptibility to  
2 *Austropuccinia psidii* in controlled inoculations

3

4 A. M. Martino<sup>1</sup>, R. F. Park<sup>2</sup>, P. A. Tobias<sup>1</sup>

5

6 <sup>1</sup>School of Life and Environmental Sciences, The University of Sydney, Camperdown NSW 2006,

7 Australia, <sup>2</sup>Plant Breeding Institute, University of Sydney, Narellan NSW 2567, Australia

8

9 Alyssa M Martino<sup>1</sup> [alyssa.martino@sydney.edu.au](mailto:alyssa.martino@sydney.edu.au) ORCID: 0000-0002-5062-3578

10 Robert F Park<sup>2</sup> [robert.park@sydney.edu.au](mailto:robert.park@sydney.edu.au) ORCID: 0000-0002-9145-5371

11 Peri A Tobias<sup>1</sup> [peri.tobias@sydney.edu.au](mailto:peri.tobias@sydney.edu.au) ORCID: 0000-0002-5645-0161

12

13 Threatened and Priority listed *Melaleuca* species from Western Australia display high susceptibility to  
14 *Austropuccinia psidii* in controlled inoculations

15

16 Abstract

17 *Austropuccinia psidii* causes rust disease on species within the family Myrtaceae and was first  
18 detected in Australia in 2010, with the first detection in Western Australia in 2022. While species  
19 within the genus *Melaleuca* from Eastern Australia show variable responses to the pathogen, little is  
20 known of the response of species from Western Australia. This study established that 13 previously  
21 unscreened species of *Melaleuca*, including Threatened and Priority species that were grown from  
22 seeds sourced from Western Australian populations, were susceptible to the pandemic strain of the  
23 pathogen. The proportion of highly susceptible plants within a single species ranged from 2% – 94%,  
24 with several species displaying highly variable levels of resistance to *A. psidii*. These results highlight  
25 the importance of disease screening and may direct conservation efforts.

26

27 Keywords

28 *Austropuccinia psidii* - myrtle rust – Western Australia - *Melaleuca*

29

30 Introduction

31 *Austropuccinia psidii*, formerly *Puccinia psidii* (Beenken 2017), is a rust fungus and the causal agent of  
32 the disease myrtle rust which impacts species within the family Myrtaceae. Originating in Brazil, the  
33 first detection of the pathogen in Australia was in 2010 and it has since spread to all states and  
34 territories except South Australia (Carnegie et al. 2010; Carnegie and Lidbetter 2012; Westaway  
35 2016; Department of Natural Resources and Environment Tasmania 2020; Agriculture Victoria 2022;  
36 The Department of Primary Industries and Regional Development 2022a). The most recent detection  
37 within Australia was in the Kimberley region of Western Australia (WA), where infection was  
38 observed on two *Melaleuca* species near the Northern Territory border (The Department of Primary  
39 Industries and Regional Development 2022b).

40 *Austropuccinia psidii* infects the young and expanding tissues of susceptible hosts, including the  
41 leaves, stems, petioles, and reproductive and seed-bearing structures. In susceptible species, yellow  
42 urediniospores appear on the infected surfaces, which may be followed by other symptoms such as  
43 leaf distortion and defoliation (Pegg et al. 2014). In species with no resistance to *A. psidii*, repeated

44 infections may lead to tree death as a result of defoliation, and impact reproduction through  
45 infection of reproductive and seed-bearing structures (Carnegie et al. 2016). In Australia, *A. psidii* has  
46 caused the near extinction of several rainforest understory species including *Rhodamnia rubescens*  
47 and *Rhodomyrtus psidioides* (Pegg et al. 2014; Carnegie et al. 2016; Environment Protection and  
48 Biodiversity Conservation Act, 1999), and could be potentially devastating for other keystone species  
49 including *Melaleuca quinquenervia* (Pegg et al. 2018).

50 *Melaleuca* is the third largest genus within the family Myrtaceae, comprising over 200 species (Ryan  
51 2016) that are adapted to a range of habitats (Naidu et al. 2000). Although well adapted, changing  
52 conditions as a result of climate change are contributing to the decline of *Melaleuca* species in  
53 Australia (Saintilan et al. 2019). An increased threat is placed on these species by *A. psidii*, with  
54 several *Melaleuca* species found to be highly susceptible to the pathogen under field conditions and  
55 in controlled inoculations (Carnegie and Lidbetter 2012; Morin et al. 2012; Pegg et al. 2014, 2018;  
56 Berthon et al. 2019; Martino et al. 2022). Further, climatic modelling predicts changes in climatic  
57 suitability for the pathogen as a consequence of climate change, with increased suitability in areas of  
58 NSW, TAS, VIC, and WA (Berthon et al. 2018).

59 WA is rich in *Melaleuca* species, with the greatest diversity and highest level of endemism located  
60 within the South-West region of the state, with up to 72 *Melaleuca* species per 100km<sup>2</sup> and  
61 endemism scores of up to 9.9 (Brophy et al. 2013). Many of these species are valued for their  
62 important ecological, cultural, and economic roles (Brophy et al. 2013). In the absence of the  
63 pathogen in the many parts of WA, the vulnerability of many *Melaleuca* species remains unknown.  
64 With the arrival of *A. psidii* into WA and high susceptibility of several *Melaleuca* species, there is an  
65 urgent need to expand current disease screening of WA species to aid pre-emptive conservation and  
66 monitoring efforts. Here, we investigated the response of 13 previously untested *Melaleuca* species  
67 to controlled inoculation with *A. psidii*. Using seed sourced from populations in areas climatically  
68 suited to *A. psidii* (Berthon et al. 2018), we aimed to determine the risk the pathogen may pose in  
69 the natural environment.

70

71 Materials and methods

72 Species selection

73 To determine the response of selected *Melaleuca* species from WA to *A. psidii*, seed was obtained  
74 from the Department of Biodiversity, Conservation and Attractions (DBCA) Kings Park and Kensington  
75 seed banks. Seed was obtained for species listed under the Biodiversity Conservation (BC) Act

76 (2016) as Threatened, including critically endangered, endangered, or vulnerable species  
77 (*Biodiversity Conservation Act 2016 (WA) s 19*), and species listed as Priority on DBCA's priority flora  
78 list (Department of Biodiversity, Conservation and Attractions 2017). While not designated under the  
79 BC Act, Priority listed species may be threatened but lack sufficient survey data to list under the Act.  
80 Seed from Priority listed species for this work include; *Melaleuca dempta*, *Melaleuca incana* ssp.  
81 *gingilup*, *Melaleuca penicula*, *Melaleuca similis*, and *Melaleuca sophisma*. Seed was also obtained for  
82 the Threatened (endangered) listed species *Melaleuca* sp. *Wanneroo*. Seed was also obtained from  
83 species listed as Not Threatened (*Biodiversity Conservation Act 2016 (WA) s 19*) and included  
84 *Melaleuca acutifolia*, *Melaleuca argentea*, *Melaleuca cajuputi* ssp. *cajuputi*, *Melaleuca fulgens* ssp.  
85 *fulgens*, *Melaleuca lanceolata*, *Melaleuca lateralis*, and *Melaleuca viminea* ssp. *appressa*. For each  
86 species, seed was collected from multiple trees with co-ordinates obtained and mapped (Figure 1).

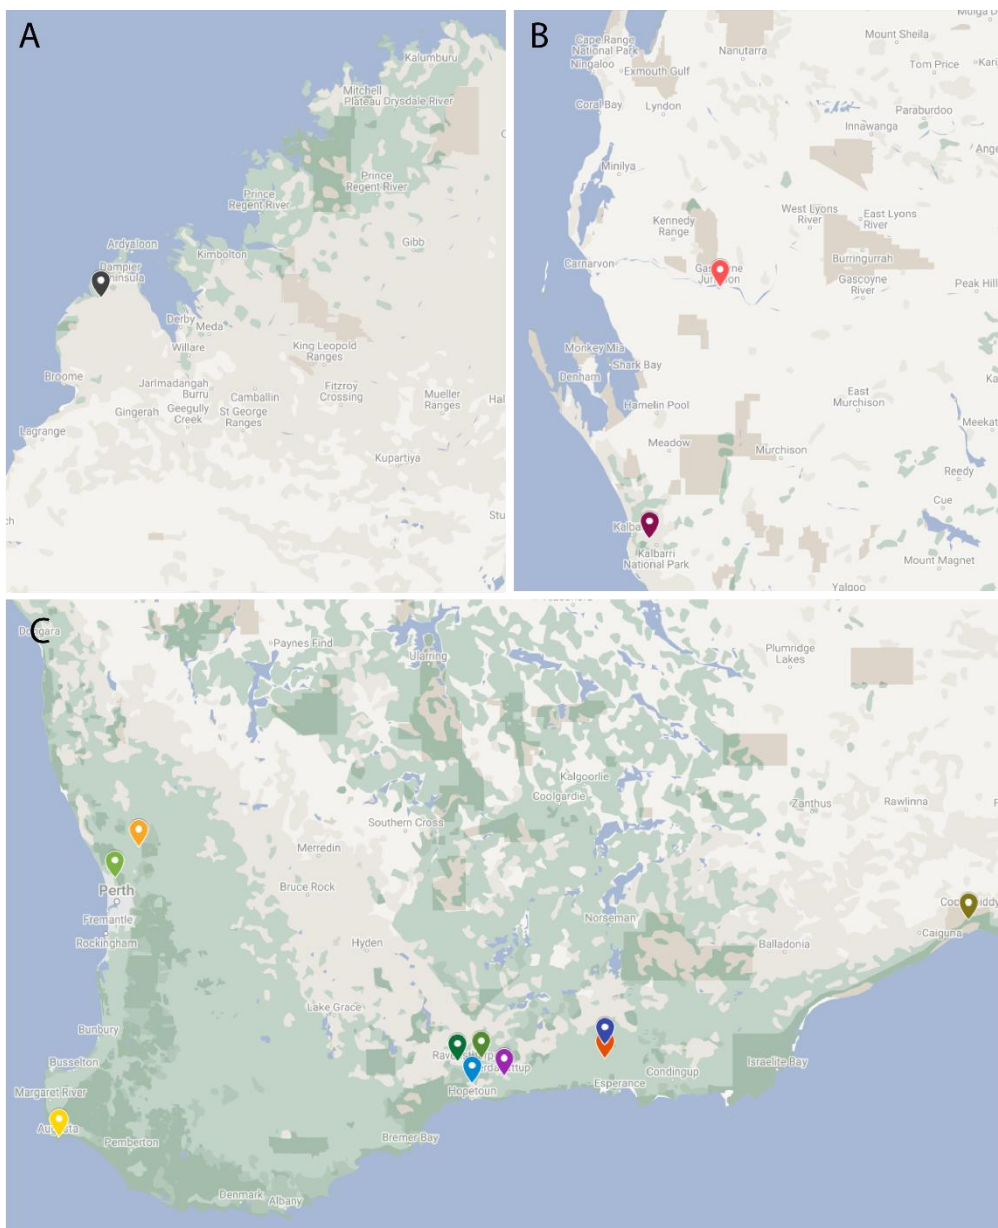

88 Figure 1. Seed collection sites by coordinate or nearest town for (A) *Melaleuca cajuputi* ssp. *cajuputi*, (B)  
89 *Melaleuca argentea* (red), *Melaleuca acutifolia* (plum), (C) *Melaleuca fulgens* ssp. *fulgens* (mustard), *Melaleuca*  
90 sp. *Wanneroo* (light green), *Melaleuca incana* ssp. *gingilup* (yellow), *Melaleuca penicula* (dark green),  
91 *Melaleuca sophisma* (light blue), *Melaleuca lateralis* (green), *Melaleuca similis* (purple), *Melaleuca viminea* ssp.  
92 *appressa* (dark blue), *Melaleuca dempta* (orange), and *Melaleuca lanceolata* (olive). Seed was collected from  
93 multiple parents at each site. Image generated in Google My Maps and interactive map is viewable at  
94 <https://tinyurl.com/zvffxccd>.

95

#### 96 Seed germination and plant growth

97 Seeds were sown into perforated trays containing a mix of 2:1:1 peat, coconut coir, and perlite  
98 supplemented with Osmocote® Native Controlled Release Fertiliser then covered with a fine coating  
99 of vermiculite. Perforated trays were placed into solid trays filled with 1 cm of water, every 3-4 days  
100 allowing for periods of drying to promote root growth. Seeds were germinated under natural light in  
101 a climate-controlled greenhouse set at 24°C/20°C day-time/night-time temperature on a 12 hour  
102 cycle. Germinated seedlings were transplanted into 85 mL pots (5 cm diameter and depth)  
103 containing a mix of 2:1:1 Osmocote® Native Premium Potting Mix, peat, and perlite supplemented  
104 with Osmocote® Native Controlled Release Fertiliser then placed on capillary mats. Seedlings were  
105 grown under the same light and temperature conditions as for germination.

106

#### 107 Seedling inoculations

108 For all species, we inoculated seedlings approximately 4 months post germination at the Plant  
109 Breeding Institute at the University of Sydney (Cobbitty, NSW) alongside four highly susceptible  
110 *Syzygium jambos* plants as positive controls. Approximately 50 mg of *A. psidii* urediniospores from a  
111 greenhouse increased single pustule isolate (accession 622) (Sandhu and Park 2013) was added to 50  
112 mL of Isopar® for a final concentration of 1 mg spores/mL. Seedlings were inoculated with the  
113 suspension using an aerosol sprayer and relocated to a humid incubation chamber for 24 hours at  
114 20°C. After incubation, seedlings were transferred to a greenhouse with the temperature set to  
115 24°C/20°C day-time/night-time temperature on a 12-hour cycle under natural light.

116

#### 117 Disease susceptibility scoring

118 Host response to *A. psidii* inoculation was scored using a 1 – 5 scoring system based on Morin et al.  
119 (2012) and adapted for disease scoring on *Melaleuca* species (this study) where 1 indicates  
120 completely resistant or no visible response and 5 indicates highly susceptible (Table 1). *Syzygium*

121 *jambos* was scored as score 5 for each round of inoculation indicating successful inoculation. As  
 122 inoculations were carried out in winter under shorter day-length conditions, disease symptoms were  
 123 slower to develop than in previous screening (Martino et al. 2022). Plants were left for 16 days prior  
 124 to scoring to allow for complete development of plant disease symptoms.

125

126 Table 1. Disease scoring scale adapted from Morin et al. (2012) to score *Melaleuca* species for their response to  
 127 *Austropuccinia psidii* in controlled inoculations. Scoring was based on the disease symptoms on *Melaleuca*  
 128 *quinquenervia* scored at 14-days post inoculation with greenhouse increased single pustule isolate (accession  
 129 622) *Austropuccinia psidii* urediniospores (Sandhu and Park 2013)

| Infection Score | Disease Rating | Infection symptoms based on Morin et al., (2012)                                                                      | Infection symptoms adapted from <i>Melaleuca quinquenervia</i> for other <i>Melaleuca</i> sp.      | Representative leaf image                                                             |
|-----------------|----------------|-----------------------------------------------------------------------------------------------------------------------|----------------------------------------------------------------------------------------------------|---------------------------------------------------------------------------------------|
| 1               | CR             | No visible symptoms attributable to rust infection                                                                    | No visible symptoms attributable to rust infection                                                 |    |
| 2               | HR             | Chlorotic, purplish, or necrotic spots or blotches                                                                    | Chlorotic or necrotic spots or blotches                                                            |   |
| 3               | MS             | Purplish or necrotic flecks with underdeveloped uredinia. Pin sized uredinia, limited sporulation                     | Necrotic flecks with limited sporulation                                                           |  |
| 4               | S              | Fully developed uredinia with or without purplish halos that cover less than 25% of the leaf and abundant sporulation | Abundant sporulation with necrotic halos. Spores may appear on leaves, stems, and/or petioles      |  |
| 5               | HS             | Fully developed uredinia with or without purplish halos that cover more than 25% of the leaf and abundant sporulation | Abundant sporulation with no visible necrosis. Spores may appear on leaves, stems, and/or petioles |  |

CR = Completely resistant, HR = Hypersensitive response, MS = Moderately susceptible, S = Susceptible, HS = Highly susceptible

130

131 Imaging

132 All images were captured using an Olympus OM-5 fitted with an Olympus M. Zuiko Premium 60mm  
133 f/2.8 Macro Lens. Raw images were processed using Adobe Photoshop 2023.

134

135 Results

136 Within 16 days post inoculation, symptoms had developed on the highly susceptible *S. jambos*  
137 control plants (Figure 2 A-B). Using the scoring system adapted for *Melaleuca* species (this study,  
138 Table 1), disease scores across all plants ranged from completely resistant (score 1) to highly  
139 susceptible (score 5) (Supplementary Figures 1 – 13). The proportion of highly susceptible plants  
140 within a single species ranged from 2% for *M. sophisma*, to 94% for *M. lateralis*. Eight of the species  
141 had individuals that were either completely resistant (score 1) or highly susceptible (score 4 or 5) to  
142 *A. psidii* (Table 2). This binary response was observed for *M. lateralis*, with 94% of plants highly  
143 susceptible and 6% with no observable symptoms and for *M. sophisma*, with 2% of plants highly  
144 susceptible and the remaining 98% with no observable symptoms (Table 2). Only three of the 13  
145 species tested; *M. argentea*, *M. cajupti* spp. *cajupti*, and *M. incana* ssp. *gingilup*, had representative  
146 plants from each disease score (Table 2). Urediniospores were observed on the leaves of all highly  
147 susceptible plants (Figure 2 C-O), as well as infection on stems and petioles on all species except for  
148 *M. sophisma* and *M. incana* ssp. *gingilup*.

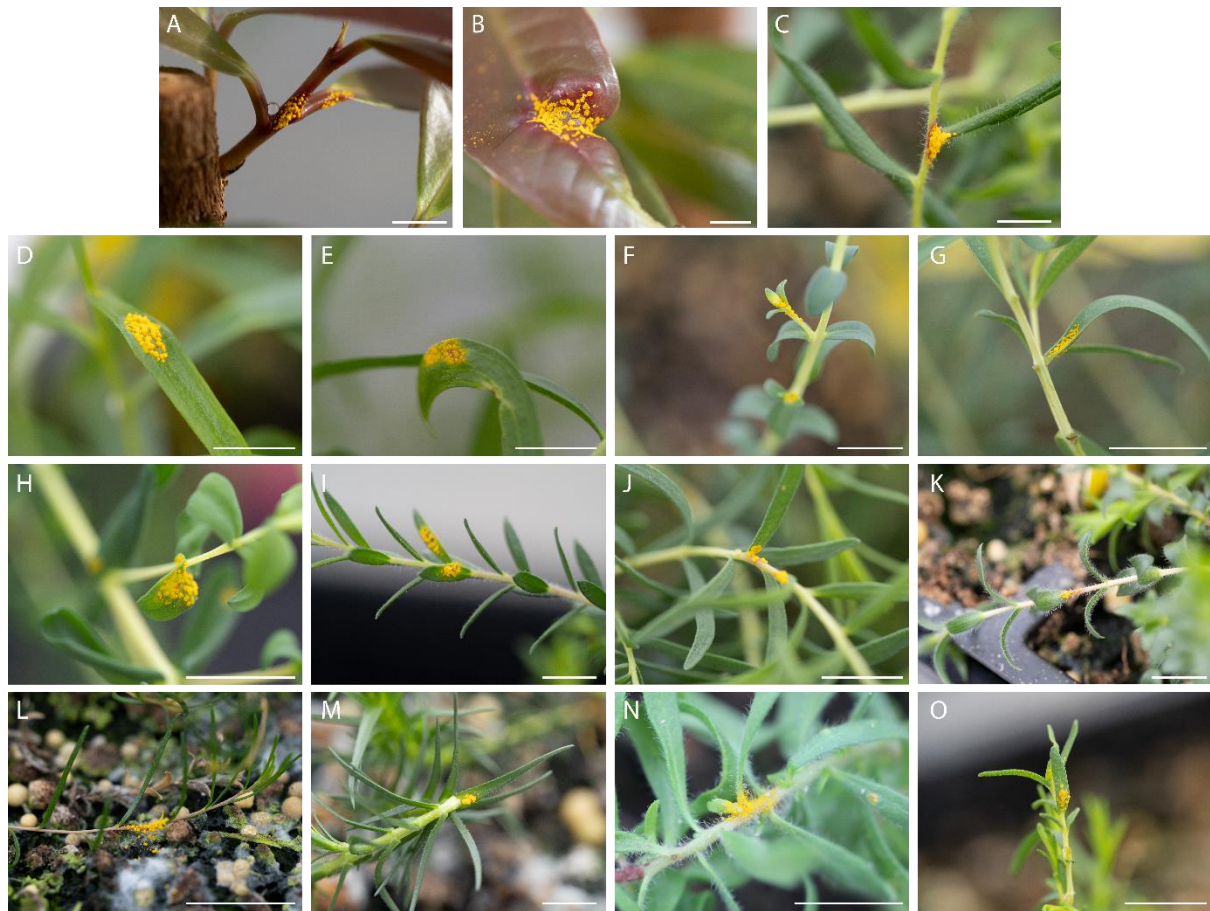

149

150 Figure 2. Representative highly susceptible disease symptoms on (A – B) *Syzygium jambos* positive control, (C)  
151 *Melaleuca acutifolia*, (D) *Melaleuca argentea*, (E) *Melaleuca cajuputi* ssp. *cajuputi*, (F) *Melaleuca dempta*, (G)  
152 *Melaleuca fulgens* ssp. *fulgens*, (H) *Melaleuca incana* ssp. *gingilup*, (I) *Melaleuca lanceolata*, (J) *Melaleuca*  
153 *lateralis*, (K) *Melaleuca penicula*, (L) *Melaleuca similis*, (M) *Melaleuca sophisma*, (N) *Melaleuca* sp. *Wanneroo*,  
154 and (O) *Melaleuca viminea* ssp. *appressa*. Scale bar = 0.5 cm.

155



156 Table 2. Disease scoring, based on Morin et al. (2012) and adapted for *Melaleuca* species (this study), of  
 157 controlled inoculation of *Austropuccinia psidii* of Threatened (*Biodiversity Conservation Act 2016* (WA) s 19)  
 158 and Priority (Department of Biodiversity, Conservation and Attractions 2017) listed *Melaleuca* species included  
 159 total number of plants scored and the percentage of plants observed in each disease scoring category

| Species name                                   | Listing under Biodiversity Conservation Act 2016 or DBCA Priority Flora List | Total Number of Plants Scored | Disease Score (% of Total Plants) |    |    |    |    |
|------------------------------------------------|------------------------------------------------------------------------------|-------------------------------|-----------------------------------|----|----|----|----|
|                                                |                                                                              |                               | 1                                 | 2  | 3  | 4  | 5  |
| <i>Melaleuca acutifolia</i>                    | NT                                                                           | 20                            | 10                                | 0  | 0  | 20 | 70 |
| <i>Melaleuca argentea</i>                      | NT                                                                           | 52                            | 44                                | 23 | 4  | 4  | 25 |
| <i>Melaleuca cajuputi</i> ssp. <i>cajuputi</i> | NT                                                                           | 54                            | 28                                | 15 | 13 | 35 | 9  |
| <i>Melaleuca dempta</i>                        | P3                                                                           | 11                            | 9                                 | 0  | 0  | 0  | 91 |
| <i>Melaleuca fulgens</i> ssp. <i>fulgens</i>   | NT                                                                           | 27                            | 18                                | 0  | 18 | 7  | 57 |
| <i>Melaleuca incana</i> ssp. <i>gingilup</i>   | P2                                                                           | 41                            | 32                                | 5  | 5  | 19 | 39 |
| <i>Melaleuca lanceolata</i>                    | NT                                                                           | 27                            | 15                                | 0  | 18 | 26 | 41 |
| <i>Melaleuca lateralis</i>                     | NT                                                                           | 31                            | 6                                 | 0  | 0  | 0  | 94 |
| <i>Melaleuca penicula</i>                      | P4                                                                           | 32                            | 66                                | 0  | 0  | 6  | 28 |
| <i>Melaleuca similis</i>                       | P1                                                                           | 45                            | 24                                | 0  | 0  | 0  | 76 |
| <i>Melaleuca sophisma</i>                      | P1                                                                           | 55                            | 98                                | 0  | 0  | 0  | 2  |
| <i>Melaleuca</i> sp. <i>Wanneroo</i>           | EN                                                                           | 80                            | 14                                | 0  | 0  | 0  | 86 |
| <i>Melaleuca viminea</i> ssp. <i>appressa</i>  | P2                                                                           | 25                            | 28                                | 0  | 0  | 4  | 68 |

160 EN = Endangered (Threatened species considered to be “facing a very high risk of extinction in the wild in the  
 161 near future, as determined in accordance with criteria set out in the ministerial guidelines”), NT = Not  
 162 Threatened, P1 - 3 = Priority 1 – 3 (Poorly-known species with conservation threat highest for Priority 1), P4 =  
 163 Priority 4 (Rare, Near Threatened and other species in need of monitoring).

164

165 Discussion

166 Here, we investigated host response to *A. psidii* in 13 previously unscreened *Melaleuca* species from  
 167 a range of geographic locations in Western Australia, revealing varying proportions of highly

168 susceptible plants within and between species. The broad-leaved paperbark species included in this  
169 study, *M. cajuputi* ssp. *cajuputi* and *M. argentea*, both displayed variability in response to *A. psidii*  
170 with plants displaying symptoms in each disease scoring category. This has previously been shown  
171 for other broad-leaved species including *M. quinquenervia*, *M. viridiflora*, and *M. leucadendra* (Pegg  
172 et al. 2018; Martino et al. 2022). Pegg et al. (2018) assessed the proportion of resistant *M. viridiflora*  
173 from two provenances in WA determining 22-23 % of seedlings were resistant to *A. psidii*. The same  
174 study assessed *M. leucadendra* seedlings from three provenances in WA determining 1- 53%  
175 resistant seedlings, while a separate study assessing a population from the Wunaamin Conservation  
176 Park in WA determined 30% of plants to be resistant to *A. psidii* (Martino et al. 2022). These results  
177 indicate variability in host response to the pathogen between populations of broad-leaved  
178 paperbarks. As the *M. cajuputi* ssp. *cajuputi* and *M. argentea* screened in this study were from grown  
179 from seed collected from a single provenance, further studies should be conducted to determine  
180 variation in host response between populations. Such information may be informative to shed light  
181 on the forces driving differences in disease resistance between populations and indicating that they  
182 may be useful for differential pathotype trials going forward.

183 Unlike the broad-leaved paperbarks, most species tested in this study displayed little variability in  
184 response to the pathogen. This difference may be explained by the geographic distribution  
185 differences of these species. For the broad-leaved paperbark species screened in this and in previous  
186 studies, populations are numerous, and broadly distributed across large geographic regions of  
187 Australia (Brophy et al. 2013). This distribution pattern is also true for *M. fulgens* ssp. *fulgens* and *M.*  
188 *lanceolata* (Western Australian Herbarium) which both display similar variability in response to the  
189 pathogen as the broad-leaved species. Conversely for *M. dempta*, *M. penicula*, *M. similis*, *M.*  
190 *sophisma*, *M. sp. Wanneroo*, and *M. viminea* ssp. *appressa* where populations are geographically  
191 sparse (Western Australian Herbarium), all display low variability in pathogen response. As  
192 *Melaleuca* species are predominantly outcrossing (Quang Tan 2008; Baskorowati et al. 2010; Brophy  
193 et al. 2013; Kartikawati et al. 2021), these differences may be explained by reductions in gene flow  
194 within small, isolated populations, resulting in reduced genetic diversity within populations.

195

196 Of particular interest is the high proportion of resistant *M. sophisma* plants observed, with only 2%  
197 of total plants susceptible to *A. psidii*. The remaining 98% of plants displayed no observable  
198 symptoms or hypersensitive response, potentially indicating preformed resistance mechanisms. The  
199 lack of a hypersensitive response has been observed in other Myrtaceae species inoculated with *A.*  
200 *psidii*, including several *Eucalyptus* species (Dos Santos et al. 2019). In species with no observable

201 symptoms post inoculation, *A. psidii* was not detected within leaf tissues as determined by qPCR (Dos  
202 Santos et al. 2019). The results indicated that the leaves were not colonised by the pathogen, with  
203 the tested hypothesis that chemical compounds within cuticular waxes provide preformed resistance  
204 in these species (Dos Santos et al. 2019). Leaf epidermal appendages have also been implicated in  
205 contributing to responses to the pathogen with studies correlating rust susceptibility with increased  
206 trichome density (Wang et al. 2020; Varma et al. 2023). Here, the suggestion is that trichomes  
207 facilitate increased adherence of spores to the leaf surface. The lack of a hypersensitive response in  
208 98% of unaffected *M. sophisma* plants may indicate reduced urediniospores adherence to the leaf  
209 surface owing to the absence of trichomes, or the inability of *A. psidii* to penetrate or colonise the  
210 leaves of this species owing to cuticular waxes. As many of these species remain poorly  
211 characterised, histological analyses during rust infection may shed light on preformed resistance  
212 mechanisms on these species.

213 Correlating disease responses in our greenhouse seedling tests with field responses will be important  
214 in defining potential risks to these species. We were encouraged by the presence of some resistant  
215 individuals within some of the listed Priority species. The results highlight the importance of  
216 continued disease screening to determine the vulnerability of individual Myrtaceae species to *A.*  
217 *psidii*. The identification of species with high susceptibility to the pathogen will be useful to inform  
218 disease surveillance in the natural environment and to direct conservation efforts such as seed  
219 collection.

220

## 221 Acknowledgements

222 This work was funded by the Australian Research Council under linkage project LP190100093 and  
223 AMM by the Australian Government Research Training Program. We thank the Department of  
224 Biodiversity, Conservation and Attractions (Kings Park and Kensington) for supplying the seed for this  
225 work and Bob Makinson for the introductions that facilitated this work.

226

## 227 Conflict of interest

228 The authors declare no conflict of interest in the reporting of these results.

229

230

231 References

- 232 Agriculture Victoria (2022) About myrtle rust. [https://agriculture.vic.gov.au/biosecurity/plant-](https://agriculture.vic.gov.au/biosecurity/plant-diseases/shrub-and-tree-diseases/myrtle-rust/about-myrtle-rust)  
233 [diseases/shrub-and-tree-diseases/myrtle-rust/about-myrtle-rust](https://agriculture.vic.gov.au/biosecurity/plant-diseases/shrub-and-tree-diseases/myrtle-rust/about-myrtle-rust). Accessed 14 Jul 2022
- 234 Baskorowati L, Moncur MW, Cunningham SA, et al (2010) Reproductive biology of *Melaleuca*  
235 *alternifolia* (Myrtaceae) 2. Incompatibility and pollen transfer in relation to the breeding  
236 system. Aust J Bot 58:384–391. <https://doi.org/10.1071/BT10036>
- 237 Beenken L (2017) *Austropuccinia*: a new genus name for the myrtle rust *Puccinia psidii* placed within  
238 the redefined family Sphaerophragmiaceae (Pucciniales). Phytotaxa 297:53-61-53–61.  
239 <https://doi.org/10.11646/PHYTOTAXA.297.1.5>
- 240 Berthon K, Esperon-Rodrigueza M, Beaumont LJ, et al (2018) Assessment and prioritisation of plant  
241 species at risk from myrtle rust (*Austropuccinia psidii*) under current and future climates in  
242 Australia. Biological Conservation journal 7:154–162.  
243 <https://doi.org/10.1371/journal.pone.0035434>
- 244 Berthon KA, Fernandez Winzer L, Sandhu K, et al (2019) Endangered species face an extra threat:  
245 susceptibility to the invasive pathogen *Austropuccinia psidii* (myrtle rust) in Australia.  
246 Australasian Plant Pathology 48:385–393. <https://doi.org/10.1007/s13313-019-00640-4>
- 247 Brophy JJ, Craven LA, Doran JC (2013) *Melaleucas*: their botany, essential oils and uses. Australian  
248 Centre for International Agricultural Research, Canberra
- 249 Carnegie AJ, Kathuria A, Pegg GS, et al (2016) Impact of the invasive rust *Puccinia psidii* (myrtle rust)  
250 on native Myrtaceae in natural ecosystems in Australia. Biological Invasions 18:127–144.  
251 <https://doi.org/10.1007/s10530-015-0996-y>
- 252 Carnegie AJ, Lidbetter JR (2012) Rapidly expanding host range for *Puccinia psidii* sensu lato in  
253 Australia. Australasian Plant Pathology 41:13–29. [https://doi.org/10.1007/s13313-011-0082-](https://doi.org/10.1007/s13313-011-0082-6)  
254 [6](https://doi.org/10.1007/s13313-011-0082-6)
- 255 Carnegie AJ, Lidbetter JR, Walker J, et al (2010) *Uredo rangelii*, a taxon in the guava rust complex,  
256 newly recorded on Myrtaceae in Australia. Australasian Plant Pathology 39:463–466.  
257 <https://doi.org/10.1071/AP10102>
- 258 Department of Biodiversity, Conservation and Attractions (2017) Threatened and Priority Flora  
259 (DBCA-036). Government Printer for the State of Western Australia.  
260 [https://www.dbca.wa.gov.au/sites/default/files/2023-](https://www.dbca.wa.gov.au/sites/default/files/2023-10/Government%20Gazette%20135%20of%202023.pdf)  
261 [10/Government%20Gazette%20135%20of%202023.pdf](https://www.dbca.wa.gov.au/sites/default/files/2023-10/Government%20Gazette%20135%20of%202023.pdf). Accessed 10 June 2023
- 262 Biodiversity Conservation Act 2016 (WA). Department of Biodiversity, Conservation and Attractions.  
263 [https://www.legislation.wa.gov.au/legislation/statutes.nsf/law\\_a147120.html](https://www.legislation.wa.gov.au/legislation/statutes.nsf/law_a147120.html)
- 264 Department of Natural Resources and Environment Tasmania (2020) Plant species affected by myrtle  
265 rust in Tasmania. [https://nre.tas.gov.au/biosecurity-tasmania/plant-biosecurity/pests-and-](https://nre.tas.gov.au/biosecurity-tasmania/plant-biosecurity/pests-and-diseases/myrtle-rust/plant-species-affected-by-myrtle-rust-in-tasmania)  
266 [diseases/myrtle-rust/plant-species-affected-by-myrtle-rust-in-tasmania](https://nre.tas.gov.au/biosecurity-tasmania/plant-biosecurity/pests-and-diseases/myrtle-rust/plant-species-affected-by-myrtle-rust-in-tasmania). Accessed 14 Jul  
267 2022
- 268 Dos Santos IB, Lopes M da S, Bini AP, et al (2019) The *Eucalyptus* cuticular Waxes contribute in  
269 preformed defense against *Austropuccinia psidii*. Frontiers in Plant Science 9:  
270 <https://doi.org/10.3389/fpls.2018.01978>

- 271 Environment Protection and Biodiversity Conservation Act 1999. Department of Climate Change,  
272 Energy, the Environment and Water. <https://www.legislation.gov.au/Details/C2016C00777>
- 273 Kartikawati NK, Rimbawanto A, Na'iem M, et al (2021) Pollen dispersal and genetic structure in a  
274 cajuput (*Melaleuca cajuputi* subsp. *cajuputi*) seed orchard in Yogyakarta, Indonesia.  
275 Australian Forestry 84:82–90. <https://doi.org/10.1080/00049158.2021.1911079>
- 276 Martino AM, Park RF, Tobias PA (2022) Three species of *Melaleuca* from Western Australia are highly  
277 susceptible to *Austropuccinia psidii* in controlled inoculations. Australasian Plant Disease  
278 Notes 17:1–4. <https://doi.org/10.1007/S13314-022-00476-W/FIGURES/2>
- 279 Morin L, Aveyard R, Lidbetter JR, Wilson PG (2012) Investigating the host-range of the rust fungus  
280 *Puccinia psidii* sensu lato across tribes of the family Myrtaceae present in Australia. PLoS  
281 ONE 7:1–7. <https://doi.org/10.1371/journal.pone.0035434>
- 282 Naidu BP, Paleg LG, Jones GP (2000) Accumulation of proline analogues and adaptation of *Melaleuca*  
283 species to diverse environments in Australia. Aust J Bot 48:611–620.  
284 <https://doi.org/10.1071/bt99059>
- 285 Pegg GS, Giblin FR, McTaggart AR, et al (2014) *Puccinia psidii* in Queensland, Australia: disease  
286 symptoms, distribution and impact. Plant Pathology 63:1005–1021.  
287 <https://doi.org/10.1007/s10530-015-0996-y>
- 288 Pegg GS, Lee DJ, Carnegie AJ (2018) Predicting impact of *Austropuccinia psidii* on populations of  
289 broad leaved *Melaleuca* species in Australia. Australasian Plant Pathology 47:421–430.  
290 <https://doi.org/10.1007/s13313-018-0574-8>
- 291 Quang Tan N (2008) Pollination ecology of *Melaleuca cajuputi*, *Nypa fruticans* and their flower  
292 visitors. Journal of Apicultural Research 47:10–16.  
293 <https://doi.org/10.1080/00218839.2008.11101417>
- 294 Ryan M (2016) Australian forest profiles: *Melaleuca*. Australian Bureau of Agricultural and Resource  
295 Economics and Sciences.  
296 [https://www.agriculture.gov.au/sites/default/files/abares/forestsaustralia/publishingimages/forest%20profiles%202019/melaleuca/AusForProf\\_2019\\_Melaleuca\\_v.1.0.0.pdf](https://www.agriculture.gov.au/sites/default/files/abares/forestsaustralia/publishingimages/forest%20profiles%202019/melaleuca/AusForProf_2019_Melaleuca_v.1.0.0.pdf). Accessed  
297 12 Jan 2023\_  
298
- 299 Saintilan N, Rogers K, Kelleway JJ, et al (2019) Climate Change Impacts on the Coastal Wetlands of  
300 Australia. Wetlands 39:1145–1154. <https://doi.org/10.1007/s13157-018-1016-7>
- 301 Sandhu KS, Park RF (2013) Genetic basis of pathogenicity in *Uredo rangelii*. 10.13140/2.1.1965.6000\_
- 302 The Department of Primary Industries and Regional Development (2022a) Myrtle rust: Biosecurity  
303 alert. [https://www.agric.wa.gov.au/plant-biosecurity/myrtle-rust-threat-western-](https://www.agric.wa.gov.au/plant-biosecurity/myrtle-rust-threat-western-australia?page=0%2C1)  
304 [australia?page=0%2C1](https://www.agric.wa.gov.au/plant-biosecurity/myrtle-rust-threat-western-australia?page=0%2C1). Accessed 14 Jul 2022
- 305 The Department of Primary Industries and Regional Development (2022b) Myrtle rust confirmed in  
306 the Kimberley. [https://www.agric.wa.gov.au/news/media-releases/myrtle-rust-confirmed-](https://www.agric.wa.gov.au/news/media-releases/myrtle-rust-confirmed-kimberley)  
307 [kimberley](https://www.agric.wa.gov.au/news/media-releases/myrtle-rust-confirmed-kimberley). Accessed 20 Jul 2023
- 308 Varma PK, Chandrasekhar V, Charumati M, et al (2023) Correlation of leaf trichome density and  
309 stomatal parameters of some commercial sugarcane genotypes to orange rust incidence and  
310 severity. Indian Phytopathology 76:641–646. <https://doi.org/10.1007/s42360-023-00624-x>

- 311 Wang Y, Zeng J, Xia X, et al (2020) Comparative analysis of leaf trichomes, epidermal wax and  
312 defense enzymes activities in response to *Puccinia horiana* in *Chrysanthemum* and  
313 *Ajania* species. Horticultural Plant Journal 6:191–198.  
314 <https://doi.org/10.1016/j.hpj.2020.03.006>
- 315 Westaway JO (2016) The pathogen Myrtle Rust (*Puccinia psidii*) in the Northern Territory: First  
316 detection, new host and potential impacts. Northern Territory Naturalist 27:13–28.  
317 <https://doi.org/10.3316/INFORMIT.426544422268311>
- 318 Western Australian Herbarium (2023). Florabase-the Western Australian Flora. Department of  
319 Biodiversity, Conservation and Attractions.  
320 <https://florabase.dbca.wa.gov.au/browse/profile/5921>. Accessed 15 Nov 2023
- 321
